# Supplementary material for: Mapping the extent of giant Antarctic icebergs with Deep Learning
Source: Copernicus journal article supplement (doi:10.5194/egusphere-2023-858), 2023-05-11
Supplement: Supplementary file [file egusphere-2023-858-RC1-supplement.pdf]

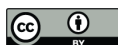

# Mapping the extent of giant Antarctic icebergs with Deep Learning

Anne Braakmann-Folgmann<sup>1</sup>, Andrew Shepherd<sup>1,2</sup>, David Hogg<sup>3</sup>, Ella Redmond<sup>1</sup>

<sup>1</sup> Centre for Polar Observation and Modelling (CPOM), University of Leeds, Leeds, LS2 9JT, UK

<sup>2</sup> Geography and Environment Department, Northumbria University, Newcastle upon Tyne, NE1 8ST, UK

5 <sup>3</sup> School of Computer Science, University of Leeds, Leeds, LS2 9JT, UK

*Correspondence to:* Anne Braakmann-Folgmann (anne.bf@gmx.de)

**Abstract.** Icebergs release cold, fresh meltwater and terrigenous nutrients as they drift and melt, influencing the local ocean properties and encouraging sea ice formation and biological production. To locate and quantify the fresh water flux from Antarctic icebergs, changes in their area and thickness have to be monitored along their trajectories. While the locations of large icebergs are tracked operationally by manual inspection, delineation of their extent is not. Here, we propose a U-net approach to automatically map the extent of giant icebergs in Sentinel-1 imagery. This greatly improves the efficiency compared to manual delineations, reducing the time for each outline from several minutes to less than 0.01 sec. We evaluate the performance of our U-net and two state-of-the-art segmentation algorithms on 191 images. For icebergs larger than covered by the training data, we find that U-net tends to miss parts. Otherwise, U-net is more robust to scenes with complex backgrounds, ignoring sea ice, smaller patches of nearby coast or other icebergs and outperforms the other two techniques achieving an  $F_1$  score of 0.84 and an absolute median deviation in iceberg area of 4.1 %.

## 1 Introduction

Icebergs influence the environment along their trajectory through the release of cold fresh water mixed with terrigenous nutrients (Duprat et al., 2016; Helly et al., 2011; Jenkins, 1999; Merino et al., 2016; Smith et al., 2007; Vernet et al., 2012). The more they melt, the higher the impact. However, this melting is not linear, but depends on the surrounding ocean temperature, current speed and many other variables that are hard to model or observe (Bigg et al., 1997; Bouhier et al., 2018; England et al., 2020; Jansen et al., 2007; Silva et al., 2006). Calculating fresh water input from satellite observations is possible and can partially be automated, but requires manual delineations of the iceberg outlines to calculate changes in iceberg area and to collocate altimetry tracks with a map of initial iceberg thickness to estimate basal melting (Braakmann-Folgmann et al., 2021, 2022). Here, we present an automated approach using a U-net (Ronneberger et al., 2015) to segment giant Antarctic icebergs in Sentinel-1 images and hence to derive their outline and area.

A number of methods have been proposed to automatically detect and segment icebergs in satellite radar imagery. Early work by Willis et al. (1996) was based on a simple thresholding technique and limited to certain iceberg sizes of a few hundred meters and certain wind conditions. Later, the Constant False Alarm Rate (CFAR) thresholding technique has been applied to detect icebergs in the Arctic (Frost et al., 2016; Gill, 2001; Power et al., 2001). Wesche and Dierking (2012) also used a



threshold based on a K-distribution fitted to observed backscatter coefficients of icebergs, sea ice and open ocean followed by morphological operations. Mazur et al. (2017) developed an algorithm for iceberg detection in the Weddell Sea based on thresholds for brightness, shape, size, etc. at five scale levels applied to ENVISAT ASAR data. Apart from thresholding, edge-detection techniques have been applied: Williams et al. (1999) used a standard edge-detection technique followed by pixel bonding (Sephton et al., 1994) applied to ERS-1 images during austral winter to detect and segment icebergs in East Antarctica. Silva and Bigg (2005) extended this to ENVISAT images and improved the algorithm by using a slightly more sophisticated edge detection technique followed by a watershed segmentation and a classification step that takes area and shape into consideration but also requires manual interventions. Collares et al. (2018) use the k-means algorithm (Macqueen, 1967) to segment icebergs, which are then manually tracked. Koo et al. (2021) employ a built-in segmentation technique similar to k-means using Google Earth Engine to segment Sentinel-1 images and then apply an incidence angle-dependent brightness threshold to find icebergs. Calculating the similarity of the distance to centroid histograms of all detected icebergs, they then track one specific giant iceberg (B43). The most elaborate algorithm has been proposed by Barbat et al. (2019) using a graph-based segmentation and Ensemble Forest Committee classification algorithm with a range of hand-crafted features.

Despite the quantity and variety of previous approaches, a range of limitations has so far hindered the operational application of an automated iceberg segmentation algorithm. Overall, previous studies have focused on smaller icebergs and perform worse on larger ones or are not even applicable there (Mazur et al., 2017; Wesche and Dierking, 2012; Willis et al., 1996). Our work extends previous studies with the goal to delineate specific giant icebergs. Giant icebergs make up a very small part of the total iceberg population but hold the majority of the total ice volume (Tournadre et al., 2016), which makes them the most relevant for freshwater fluxes. Apart from iceberg size, there are many remaining challenges resulting from the variable appearance of icebergs as well as the surrounding ocean or sea ice in SAR imagery (Ulaby and Long., 2014). Some of the existing techniques are therefore limited to austral winter images and still require manual intervention (Silva and Bigg, 2005; Williams et al., 1999). Dark icebergs remain a problem for all existing methods using SAR images. Many studies also report degrading accuracies in high wind conditions (Frost et al., 2016; Mazur et al., 2017; Willis et al., 1996). Deformed sea ice or sea ice in general is also mentioned to lead to false detections (Koo et al., 2021; Mazur et al., 2017; Silva and Bigg, 2005; Wesche and Dierking, 2012; Willis et al., 1996). And finally clusters of several bergs and berg fragments too close to each other have been found to pose a problem (Barbat et al., 2019b; Frost et al., 2016; Koo et al., 2021; Williams et al., 1999). Our work aims to delineate icebergs in a variety of environmental conditions as accurately as possible using a deep learning technique.

Deep neural networks can encode the most meaningful features themselves and are able to learn more complex non-linear relationships. They therefore outperform classic machine learning techniques in most tasks (LeCun et al., 2015; Schmidhuber, 2015). U-net is a neural network that was originally developed for biomedical image segmentation (Ronneberger et al., 2015). It has since been applied to many other domains including satellite images and polar science (Andersson et al., 2021; Baumhoer et al., 2019; Dirscherl et al., 2021; Mohajerani et al., 2019, 2021; Poliyapram et al., 2019; Singh et al., 2020; Stokholm et al., 2022; Surawy-Stepney et al., 2023; Zhang et al., 2019). U-net works well with few training examples, trains quickly and still

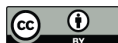

65 achieves very good results (Ronneberger et al., 2015). A comparison between three network architectures (Deeplab, DenseNet  
and U-net) for river ice segmentation found that U-net provided the best balance between quantitative performance and good  
generalization (Singh et al., 2020). Baumhoer et al. (2019) used a U-net architecture to automatically delineate ice shelf fronts  
in Sentinel-1 images with good success (108 m average deviation). As the calving front to ocean boundary looks very similar  
to an iceberg to ocean boundary and both goals have to deal with comparable problems like near-by sea ice and varying  
70 appearance of the ice, ocean and sea ice surfaces, we decided to also employ a U-net.

## 2 Data and methods

This section describes the Sentinel-1 input data, generation of the manually derived outlines for training, validation and testing,  
the implementation of two standard segmentation methods and our U-net architecture. The goal is to derive the outlines of  
Antarctic icebergs, which are large enough to receive a name and to be tracked operationally. Therefore, we aim to generate a  
75 binary segmentation map, where the biggest iceberg present is selected and everything else – including smaller icebergs,  
iceberg fragments and adjacent land ice – is considered as background. This approach differs from most previous work, where  
the goal has been to find all icebergs and is targeted to monitor changes in area of these large bergs, but also to track how the  
icebergs rotate and to use their outline to automatically collocate altimetry overpasses (Braakmann-Folgmann et al., 2022).

### 2.1. Sentinel-1 input imagery

80 The Sentinel-1 satellites measure the backscatter of the surface beneath them using Synthetic Aperture Radar (SAR). In  
contrast to optical imagery, SAR provides data throughout the polar night and independent of cloud cover (Ulaby and Long.,  
2014), which is frequent over the Southern Ocean. The Sentinel satellites are an operational satellite system with free data  
availability (Torres et al., 2012). Sentinel-1a (2014-present) and Sentinel-1b (2016-2022) had a combined repeat cycle of 6  
days (Torres et al., 2012), but the polar regions are sampled more frequently. We use the Level 1 Ground Range Detected  
85 (GRD) data. Depending on the geographic location around Antarctica, data is collected in either interferometric wide (IW) or  
extra wide (EW) swath mode. IW is a 250 km wide swath with 5 x 20 m native spatial resolution and EW is a 400 km wide  
swath with 20 x 40 m native resolution. We use both modes depending on availability. While HH (horizontal transmit and  
horizontal receive) polarised data is available across the Southern Ocean, HV (horizontal transmit and vertical receive) data is  
only available in some parts. As icebergs drift across these acquisition masks and HH has been found to give the best results  
90 for iceberg detection (Sandven et al., 2007), we use the HH polarised data only.

We pre-process and crop the Sentinel-1 images before applying the segmentation techniques. First, we apply the precise orbit  
file, remove thermal noise and apply a radiometric calibration. We also multilook the data with a factor of six to reduce speckle  
and image size, yielding a spatial resolution of 240 m. Then we apply a terrain correction using the GETASSE30 (Global Earth  
Topography And Sea Surface Elevation at 30 arc second resolution) digital elevation model and project the output on a polar  
95 stereographic map with true latitude of 71°S. These pre-processing steps are conducted in the Sentinel Application Platform



(SNAP). All icebergs that are longer than 18.5 km (10 nautical miles) or that encompass an area of at least 68.6 km<sup>2</sup> (20 square nautical miles) are named and tracked operationally every week by the National Ice Center (NIC). Also slightly smaller icebergs (longer than 6 km) are tracked by the Brigham Young University (Budge and Long, 2018), who release daily positions every few years. Therefore, we have a good estimate of where each of these giant icebergs should be and cannot only download targeted Sentinel-1 images containing these icebergs, it also crop the images around the estimated central position to a size of 256 x 256 pixels. Hence, every input image contains a giant target iceberg. Some images contain several icebergs, in this case, we are only interested in the largest one. To ensure that the largest bergs fit within the image, we rescale images of icebergs with a major axis longer than 37 km (20 nautical miles). As the NIC also provides estimates of the semi major axes lengths, we apply the rescaling based on this. The rescaled images have a pixel resolution of 480 m instead. For all input images, we scale the backscatter between the 1<sup>st</sup> and 99<sup>th</sup> percentile to enhance the contrast. In this step, we also replace pixels outside the satellite scene coverage with ones, and create a mask to discard the same pixels from the predictions.

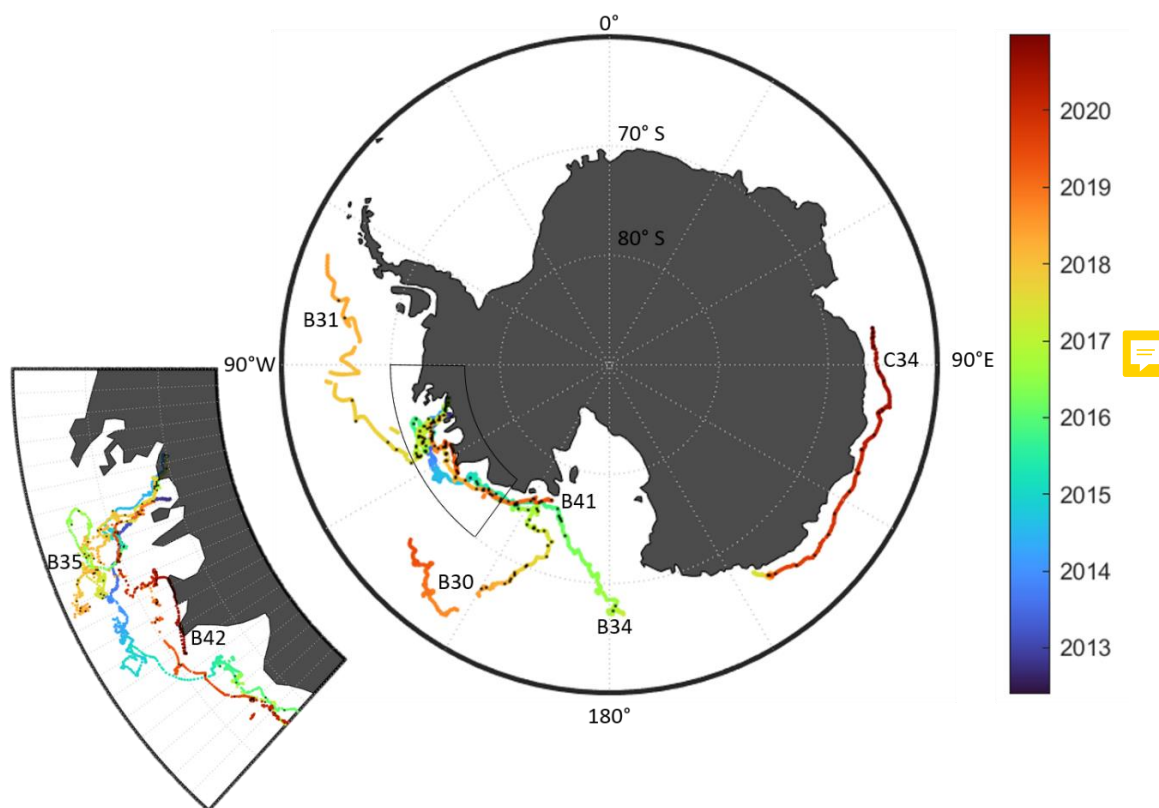

110 **Figure 1: Spatial and temporal coverage of our dataset: The trajectories (by Budge and Long, 2018) of the seven selected icebergs are colour-coded according to time and black squares indicate the locations of the images used in this study.**

The overall dataset consists of 191 images, showing seven giant icebergs: B30, B31, B34, B35, B41, B42 and C34. These are between 54 and 1052 km<sup>2</sup> in size. B30 is the only iceberg that is initially longer than 37 km, so we rescale the first 27 images,



until its length drops below 37 km. A further two images of this iceberg are then used at normal resolution (Figure 4 first column shows rescaled images of B30 and the last one at normal resolution). Spatially, we cover different parts of the Southern Ocean including the Pacific and Indian Ocean sides with a focus on the Amundsen Sea (see Figure 1). Temporally, our images span the years 2014-2020 and are scattered across all seasons. For each iceberg, the individual images are roughly one month apart. Far higher temporal sampling would be possible in terms of satellite image availability, but we aim to cover a wide range of environmental conditions, seasons and iceberg shapes and sizes. As these are highly correlated in subsequent images, we decided to use only one image per month.

## 2.2. Grouping of input images according to environmental conditions

The appearance of icebergs versus the surrounding ocean or sea ice depends on their roughness, the dielectric properties (e.g. moisture of the ice) and the angle of satellite overpass (Figure 2). While calm ocean appears as a dark surface in SAR images, wind roughened sea appears brighter depending on the relative wind direction versus the satellite viewing angle (Young et al., 1998). Thin sea ice has a similar backscatter to calm sea (Young et al., 1998), but rougher first-year ice already exhibits higher backscatter and multi-year ice can reach backscatter values overlapping with the range of typical iceberg backscatter (Drinkwater, 1998). Icebergs with dry, compact snow are usually bright targets in SAR images (Mazur et al., 2017; Wesche and Dierking, 2012; Young et al., 1998). However, surface thawing can reduce the iceberg backscatter significantly (Young and Hyland, 1997), meaning that those icebergs have the same or lower backscatter than the surrounding ocean and sea ice and appear as dark objects (Wesche and Dierking, 2012; see our Figure 2, last column). Furthermore, giant tabular icebergs can exhibit a gradient (Barbat et al., 2019a) due to variations in backscatter with the viewing angle (Wesche and Dierking, 2012) or appear heterogeneous due to crevasse (see Figure 2, third and last column), which also complicates segmentation and differentiation from the surrounding ocean and sea ice.

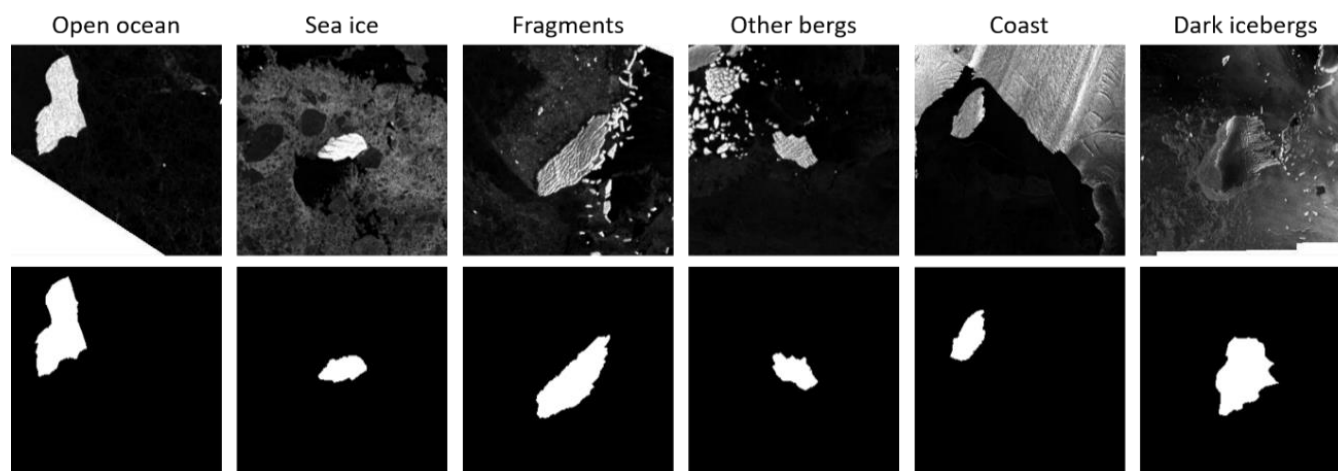

Figure 2: Examples of input images (top row) and segmentation maps based on manually derived delineations (bottom row) in different environmental conditions. From left to right these are B31 in open ocean, B41 surrounded by sea ice, B42 with nearby fragments, C34 and another similar sized iceberg, B41 close to the coast and B30 appearing dark.



We visually group all input images into different categories to assess the performance in different potentially challenging conditions. These groups are *open ocean*, *sea ice*, *fragments*, *other bergs*, *coast* and *dark icebergs* (Figure 2 shows one example each). We class an image as *dark iceberg*, if the iceberg appears as dark or does not stand out from the background because both have a similar intensity of grey, making it hard to pick out the berg (Wesche and Dierking, 2012). Images that contain *coast* (i.e. nearby ice shelves or glaciers on the Antarctic continent) are grouped into this category. Due to very similar physical conditions, ice-shelves and icebergs are hard to differentiate. In some cases, several giant icebergs drift very close to each other and both are (partially) visible in our cropped images. If another berg of similar size is present, the algorithms might pick the wrong berg and therefore we introduce one group of *other bergs*. There is also one case where a bigger iceberg is partially visible, but we are aiming to segment the largest berg that is fully visible (e.g. Figure 5h). Fragments occur frequently in the vicinity of icebergs, as icebergs regularly calve smaller bits and pieces around their edges. We assign images to this category if the fragments pose a challenge because they are close to the icebergs that they are easily grouped together (Koo et al., 2021). The last challenge is *sea ice*. Young and flat sea ice usually appears homogenous and dark and does not pose a problem. However, older, ridged sea ice and other cases where the background appears grey rather than black with significant structure (Mazur et al., 2017) are grouped into this category. If the sea ice is not visually apparent (i.e. young and flat) and the background appears as dark and relatively homogenous or only contains fragments that are further away from the iceberg and hence there is no obvious challenge apparent to us, we class these images as *open ocean*. If several challenges are present (e.g. if *coast* and *sea ice* are visible), we assign the image to the most relevant group.

### 2.3. Manual delineation of iceberg perimeters

Although the goal is to develop an automated segmentation technique, we require manual delineations of iceberg extent for training and evaluation. We manually click the iceberg perimeter in GIS software to yield a polygon. The accuracy of such manual delineations is estimated to be 2-4 % of the iceberg area (Bouhier et al., 2018; Braakmann-Folgmann et al., 2021, 2022). We then create a binary map of the same size as the input image, where pixels within the manually derived polygon are defined as iceberg and everything else as background to allow a rapid evaluation of performance. Some examples of input images and their corresponding segmentation maps based on the manual outlines are shown in Figure 2. We regard the manually derived outlines as the most accurate and use these binary maps to train our neural network and to evaluate all automated segmentation techniques. When the area deviation of our automated segmentation techniques drops below 2-4 %, their prediction might be more accurate than the manual delineation. In any case, automated approaches are advantageous over manual delineations – especially when rolled out for numerous icebergs or in operational applications, as each outline takes several minutes to click manually.

### 2.4. Iceberg segmentation with k-means and Otsu

We implement two standard segmentation techniques as a baseline: Otsu thresholding and k-means. In both cases, we mask out the areas that had no satellite scene coverage by setting them to zero (black). For the first segmentation technique, we

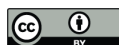

smooth the input image with a 5x5 Gaussian kernel. Then we apply the Otsu threshold (Otsu, 1979) yielding a binary image.  
170 The Otsu threshold is determined automatically based on the image's greyscale histogram so that the within-class variance is  
minimised. To find an iceberg, we apply connected component analysis to the binary image and select the largest component.  
We also experimented with other thresholding techniques including adaptive mean and adaptive Gaussian thresholding, but  
found that the Otsu threshold gave the best results. Although different thresholding techniques have been proposed for iceberg  
detection (Frost et al., 2016; Mazur et al., 2017; Power et al., 2001; Wesche and Dierking, 2012; Willis et al., 1996), to our  
175 knowledge none of them have used the Otsu method. The second technique is k-means (Macqueen, 1967) with k=2. We use  
random centre initialisation and run the algorithm for 20 iterations or until an accuracy of 0.5 is reached. We repeat this 100  
times with different initialisations and take the result with the best compactness. Afterwards, we also perform a connected  
component analysis and select the largest component. K-means and a variation of it have also been applied to track selected  
icebergs by Collares et al. (2018) and Koo et al. (2021) respectively. Both our standard segmentation techniques are  
180 implemented using the OpenCV library (Bradski, 2000) for Python.

## 2.5. Iceberg segmentation with U-net

We suggest a U-net architecture to segment Sentinel-1 input images into the largest iceberg and background, which is based  
on the original U-net (Ronneberger et al., 2015) with some modifications. The input images are 256 x 256 one-channel  
backscatter images (as described in Section 2.1. and shown in Figure 2). The U-net is composed of an encoder that produces  
185 a compressed representation of the input image followed by a decoder that constructs a segmentation map from the compressed  
encoding with the same spatial resolution as the input (Figure 3). The encoder uses a number of convolutional and pooling  
layers to generate feature maps at increasing levels of abstraction and spatial scale. The decoder uses further convolutional  
layers and upsampling to construct the required segmentation map. Cross-links convey feature maps from different spatial  
scales in the encoder to the respective decoder stage, where they are combined with contextual feature maps from the decoder  
190 layer below. This allows U-net to produce accurate segmentations whilst also considering contextual features. We use padding  
in the convolutions and pooling operations, so that the feature maps remain the same size as the input at each level (spatial  
scale) and reduce by 50% in height and width between encoder levels. We also use depth-wise separable convolutions (Chollet,  
2017), which are more efficient. Furthermore, we added dropout of 0.3 in between the two convolutions per level to avoid  
over-fitting (Srivastava et al., 2014) and residual connections to aid the learning process and increase the accuracy (He et al.,  
195 2016). The outputs are one-channel 256 x 256 arrays, representing the probability that each pixel belongs to the iceberg class.  
During training these output maps are compared with the segmentation maps from our manually derived outlines to alter the  
network parameters accordingly. When evaluating the validation and test data output, we convert the probability map to a  
binary output, where 1 corresponds to the iceberg class and 0 to background (everything else), by thresholding it at 0.5. As we  
are only interested in the largest iceberg and would like to discard other smaller icebergs and iceberg fragments around, we  
200 also apply a connected component analysis and select the largest component (Figure 3).

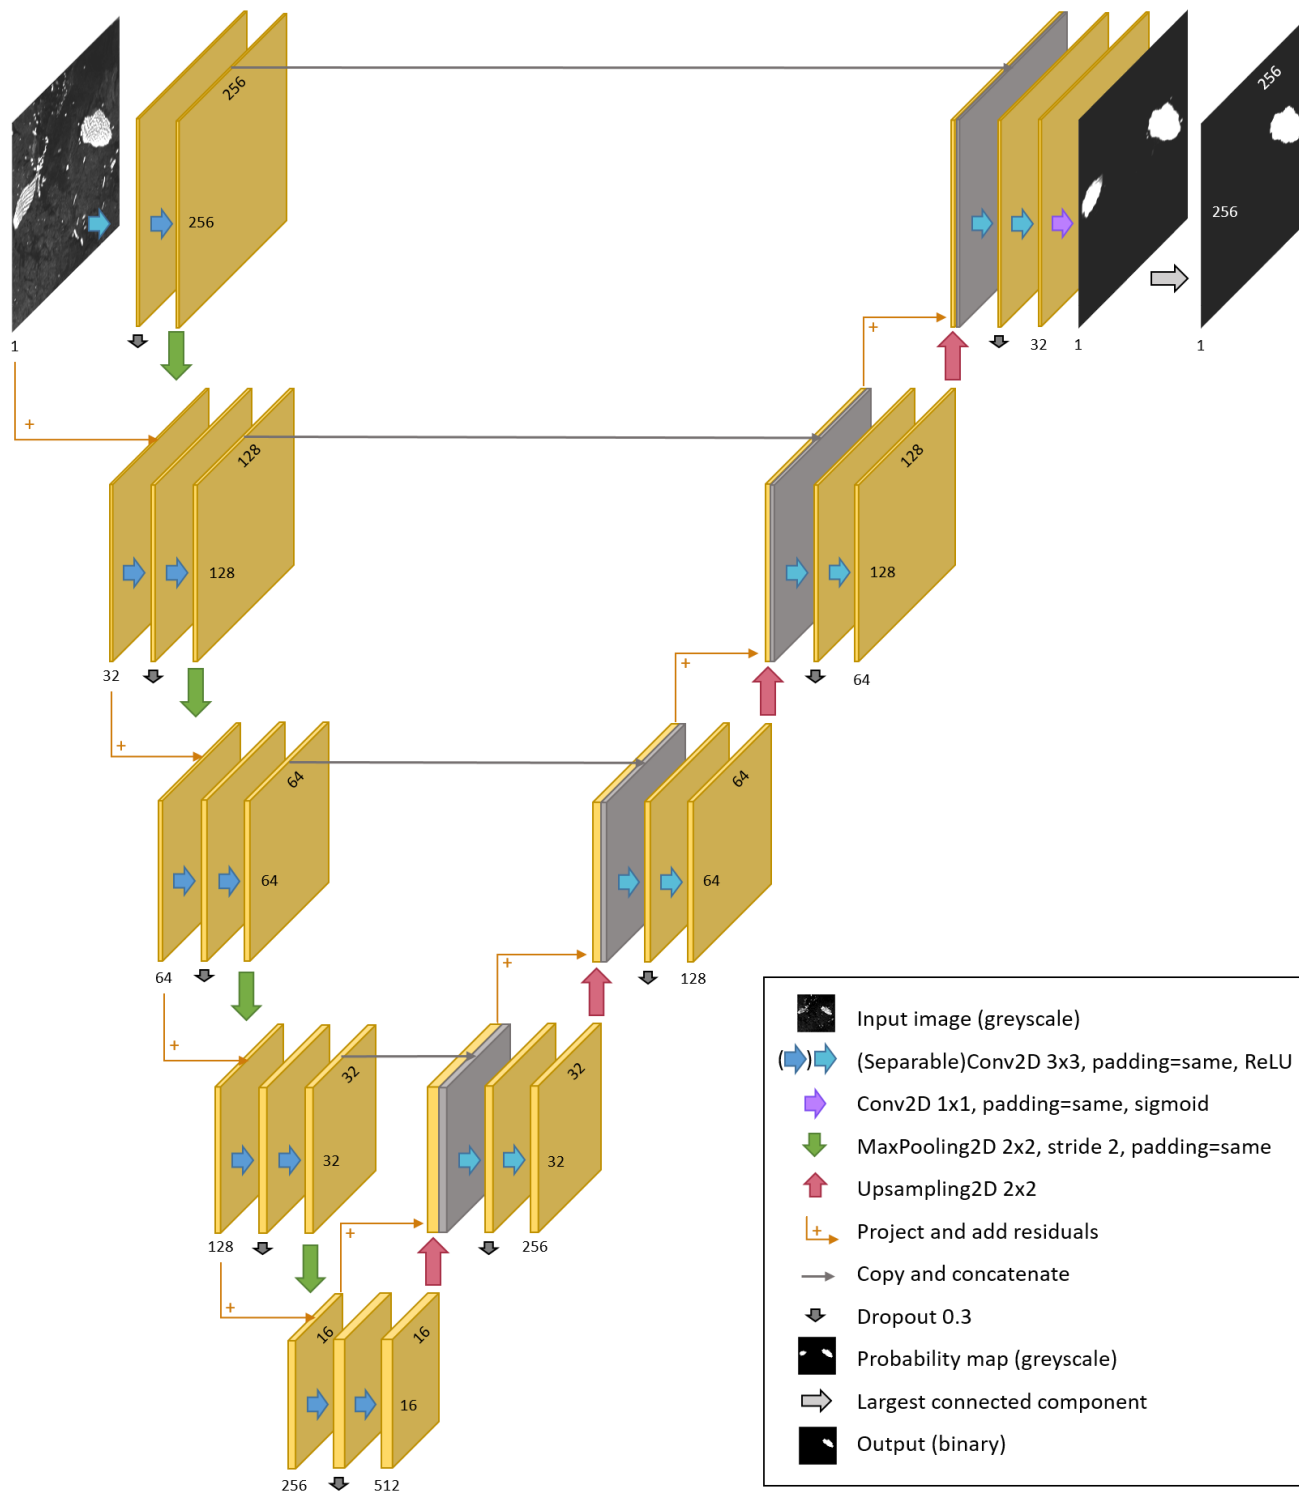

Figure 3: Modified U-net architecture as used in this paper





We train and evaluate the network using cross-validation. This means that we train seven different neural networks and always retain the images of one iceberg for testing as an independent dataset. The exact number of test images varies, as we have  
205 between 15 and 46 images per iceberg (Table 2). Although the images are roughly one month apart and cover a wide range of seasons and surroundings overall (e.g. near the calving front, surrounded by sea ice and within open ocean), we find that consecutive images of the same iceberg are often similar – both concerning iceberg shape, size and appearance as well as the surrounding. Therefore, we do not mix training and test data. On the other hand, and for the same reason, we find that it stabilises the training process, if we draw training and validation data from the same set of icebergs. 24 images are taken as  
210 validation data, which is used to set the best performing hyperparameters (i.e. network architecture, number of layers, optimizer, learning rate, loss function and batch size). It also determines when we stop the learning process to avoid overfitting. Depending on which iceberg was picked for testing, this leaves between 121-152 images for training. We train the network end-to-end using a binary cross entropy loss function and a batch size of one. Higher batch sizes had little impact on the performance and run time. The Adam optimizer (Kingma and Ba, 2015) is employed with an initial learning rate of 0.001. The  
215 learning rate is halved when the validation loss has not decreased for eight consecutive epochs. Training is stopped when the validation loss has not improved for 20 epochs. In practice, this means that the networks are trained for 57-193 epochs. The implementation is done in Python using Keras (Chollet and Others, 2015). Training takes up to 20 minutes on a Tesla P100 GPU with 25 GB RAM (Google Colab Pro). The prediction for 24 images takes 0.2 seconds.

### 3 Results and discussion

220 In this section, we present and discuss the results from the three different approaches (U-net, Otsu and k-means). The best visualisation of the results can be found in the supplementary animations (Braakmann-Folgmann, 2023), showing iceberg outlines from all methods and for all 191 images. There is one animation per iceberg. Our analysis in the following is based mainly on statistics, but we also show some examples. After an overall analysis, we assess the performance for each iceberg and evaluate the impact of iceberg size and different challenging environments. Finally, we compare our results to previous  
225 studies.

#### 3.1. Performance of the three methods

We evaluate the performance of the three methods compared to the manual delineations using a range of metrics. True positives (TP) are all correctly classified iceberg pixels and true negatives (TN) are all correctly classified background pixels. False positives (FP) are pixels that were classified as iceberg but belong to the background according to manual delineations and  
230 false negatives (FN) are iceberg pixels in the manually derived segmentation map, which the algorithm has missed and erroneously classified as background. These are the basis for most evaluation metrics including the overall accuracy, the  $F_1$  score (also known as the coefficient), misses (also known as false negative rate) and false alarms (also known as false positive rate). The detection rate is equal to the iceberg class accuracy and can be derived from 1-misses; hence, we do not list it

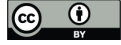

separately. In the case of a large class imbalance, the  $F_1$  score is much more meaningful than the overall accuracy. The iceberg  
235 class makes up only 5 % of all pixels, so we focus on the  $F_1$  score but list the overall accuracy for completeness. Except the  
 $F_1$  score, all measures are given in percent. In addition to these metrics commonly used to evaluate segmentation algorithms,  
we also examine the accuracy of the resulting area estimates  $a_i$ . We calculate the mean absolute error (MAE) in area, the mean  
error (area bias) and the median absolute deviation (MAD) in area. We focus on the MAD, as it is robust to a few complete  
failures. However, some previous studies have reported the MAE in area, but most have reported the area bias, so we also list  
240 these for completeness. Areas  $a_i$  and  $\alpha_i$  are calculated as the sum of all iceberg pixels in the prediction and manually derived  
segmentation map respectively multiplied by the pixel area. All area deviations are relative deviations and given in percent  
compared to the iceberg area in the manually derived segmentation map. We also calculate the standard deviation for each  
metric. Only the MAD is given with the 25 % and 75 % quantiles instead.

$$245 \quad F_1 = \frac{2 TP}{2TP+FN+FP} \quad (1)$$

$$\text{Overall accuracy} = \frac{TN+TP}{TN+TP+FN+FP} \quad (2)$$

$$\text{Misses} = \frac{FN}{FN+TP} \quad (3)$$

$$250 \quad \text{False alarms} = \frac{FP}{FP+TN} \quad (4)$$

$$\text{MAE} = \frac{1}{n} \sum_{i=1}^n \frac{|a_i - \alpha_i|}{\alpha_i} \quad (5)$$

$$\text{Area bias} = \frac{1}{n} \sum_{i=1}^n \frac{a_i - \alpha_i}{\alpha_i} \quad (6)$$

$$255 \quad \text{MAD} = \text{median} \left( \frac{|a_i - \alpha_i|}{\alpha_i} \right) \quad (7)$$

Comparing the performance of all three techniques, we find that U-net outperforms Otsu and k-means in most metrics. It  
achieves a significantly higher  $F_1$  score (0.84 compared to 0.62, Table 1) and generates many fewer false alarms (0.4 % instead  
of 4.7 and 5.2 %). On the other hand, both standard segmentation methods have fewer misses than U-net (9 % and 13 %  
260 compared to 21 %). On this metric Otsu scores best. In terms of iceberg area, the predictions by U-net are much closer to the  
manually derived outlines in terms of MAE and bias. Otsu and k-means clearly suffer from a few total failures with over 100 %  
deviation, which bias these metrics in their cases. The MAD, which is less sensitive to such outliers, is similar for the three  
methods, with Otsu scoring best (3.6 %), followed by U-net (4.1 %) and k-means (5.1 %). The 25 %-quantiles are very similar  
for all three methods (2.0, 2.1 and 2.2 % respectively). On the 75 %-quantiles, U-net achieves slightly better results (12.1 %  
265 area deviation, compared to 13.8 % and 14.9 % for k-means and Otsu). This means that 75 % of all U-net predictions deviate  
from the manually derived area by 12.1 % or less. Overall, U-net scores better in most categories but tends to miss parts and  
misclassify iceberg as background.

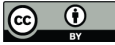

270

**Table 1: Performance metrics with standard deviations of U-net, Otsu and k-means across all test data sets (191 images). The median absolute area deviation (MAD) is given with 25 % and 75 % quantiles instead of standard deviation. Arrows indicate whether high (up) or low (down) numbers are desirable. The best score per metric is highlighted in bold.**

|                | F <sub>1</sub> score ↑ | Overall accuracy [%] ↑ | Misses [%] ↓  | False Alarms [%] ↓ | MAE in area [%] ↓ | Area bias [%] ↓ | MAD in area [%] ↓       |
|----------------|------------------------|------------------------|---------------|--------------------|-------------------|-----------------|-------------------------|
| <b>U-net</b>   | <b>0.84 ± 0.30</b>     | <b>99 ± 2</b>          | 21 ± 32       | <b>0.4 ± 0.3</b>   | <b>15 ± 26</b>    | <b>-5 ± 29</b>  | 4.1 [2.1 – 12.1]        |
| <b>Otsu</b>    | 0.62 ± 0.34            | 95 ± 13                | <b>9 ± 28</b> | 5.2 ± 0.3          | 170 ± 490         | 170 ± 490       | <b>3.6 [2.0 - 14.9]</b> |
| <b>k-means</b> | 0.62 ± 0.33            | 95 ± 12                | 13 ± 28       | 4.7 ± 0.3          | 150 ± 460         | 150 ± 460       | 5.1 [2.2 – 13.8]        |

### 3.2. Impact of iceberg size

Next, we evaluate how U-net performs for each of the seven different giant icebergs (Table 2, shaded in grey and Figure 4) to assess the impact of the chosen test data set and different iceberg sizes. Here, we find that B34 gives the best results. The dataset for this iceberg is the smallest (15 images), meaning that there are more images left for training and the background is usually not too challenging. B41 gives the lowest F<sub>1</sub> score. This dataset is the largest one, containing 46 images, and hence leaves the least number of images for training. Furthermore, B41 stays very close to its calving position for a while, which means that the first 13 images contain a significant amount of coast – often directly next to the iceberg (see Figure 4 and supplementary animation for all images). In these cases, the methods pick the coast rather than the iceberg (as discussed later). The highest MAD and miss rate occur for iceberg B31. Because the images of B30 – our largest berg – are resized, this means that B31 appears largest in the images. Therefore, we believe that the large size of the berg, which U-net has not seen in the training data, causes U-net to miss parts of the iceberg (Figure 4 and Figure 5b, f). This is supported by the fact that U-net misses large parts of B31 in the beginning (first few images in Figure 4), then misses smaller parts and once the iceberg has decreased to a size similar to other icebergs, U-net works fine (last four images of B31 in Figure 4). In general, we find quite variable performance depending on which iceberg is retained as test data. This is because the same challenges (e.g. iceberg size, shape, surrounding) occur in subsequent images of the same iceberg, even when they are one month apart (best seen in the supplementary animations). It is also the reason why we decided to evaluate the methods using cross-validation, as this makes the analysis less sensitive to the choice of a single iceberg as test data.

Also, Otsu and k-means the performance varies a lot depending on which iceberg is chosen as test data. The F<sub>1</sub> scores for Otsu range from 0.20 – 0.91, being lowest for C34 and highest for B31. Similarly, k-means also reaches the lowest F<sub>1</sub> score of 0.23 for C34 and the highest for B31 of 0.93. Compared to that, U-net is more consistent, reaching F<sub>1</sub> scores between 0.68 – 0.97, but still exhibits significant variability. The fact that Otsu and k-means score so well for B31 also indicates that this data set is not hard per se. We rather suspect that we are challenging U-net too much when the iceberg in the test data is bigger than any iceberg in the training data. Neural networks are known to struggle with a domain-shift, where the test data is from a shifted version of the training data distribution and even more with out-of-domain samples from outside the training data

295



distribution (Gawlikowski et al., 2021). Both are caused by insufficient training data, not or barely covering these examples. Therefore, we recommend expanding the training data before applying U-net operationally or to icebergs larger than covered by the current training data set. In contrast, iceberg B41, where U-net reaches the lowest F<sub>1</sub> score, poses an even greater problem to the other algorithms, meaning that this dataset is actually challenging. Finally, we observe that U-net achieves the lowest false alarm rate on each iceberg. Otsu generates most false alarms (highest rate for six out of seven icebergs) but also achieves the lowest miss rate for four out of seven icebergs. Except for B31, U-net consistently achieves the highest F<sub>1</sub> score. In terms of MAD in area, k-means and U-net score best on three out of the seven icebergs each.

**Table 2: Performance of the three methods for each test data set (iceberg). The number of images per iceberg and their minimum and maximum size is also given. Note that most images of B30 are rescaled, so it appears smaller in the images. Arrows indicate whether high (up) or low (down) numbers are desirable. The best score per iceberg and metric are highlighted in bold.**

|                                                     |         | F <sub>1</sub> score ↑ | Misses [%] ↓ | False Alarms [%] ↓ | MAD in area [%] ↓ |
|-----------------------------------------------------|---------|------------------------|--------------|--------------------|-------------------|
| <b>B30</b><br>29 images<br>463-1052 km <sup>2</sup> | U-net   | <b>0.90</b>            | 15           | <b>0.3</b>         | 3.3               |
|                                                     | Otsu    | 0.77                   | <b>9</b>     | 3.2                | 2.7               |
|                                                     | k-means | 0.79                   | 12           | 2.4                | <b>2.4</b>        |
| <b>B31</b><br>32 images<br>79-518 km <sup>2</sup>   | U-net   | 0.79                   | 34           | <b>0.2</b>         | 13.6              |
|                                                     | Otsu    | 0.91                   | <b>5</b>     | 1.6                | 3.0               |
|                                                     | k-means | <b>0.93</b>            | 6            | 1.0                | <b>1.9</b>        |
| <b>B34</b><br>15 images<br>97-241 km <sup>2</sup>   | U-net   | <b>0.97</b>            | 2            | <b>0.2</b>         | 2.1               |
|                                                     | Otsu    | 0.83                   | <b>1</b>     | 1.7                | <b>1.2</b>        |
|                                                     | k-means | 0.80                   | 8            | 1.6                | 8.3               |
| <b>B35</b><br>21 images<br>62-158 km <sup>2</sup>   | U-net   | <b>0.94</b>            | <b>2</b>     | <b>0.3</b>         | 6.9               |
|                                                     | Otsu    | 0.66                   | 9            | 2.3                | 7.4               |
|                                                     | k-means | 0.63                   | 10           | 2.5                | <b>4.0</b>        |
| <b>B41</b><br>46 images<br>54-116 km <sup>2</sup>   | U-net   | <b>0.68</b>            | 33           | <b>0.7</b>         | <b>3.5</b>        |
|                                                     | Otsu    | 0.27                   | 13           | 10.5               | 3.8               |
|                                                     | k-means | 0.29                   | <b>11</b>    | 10.1               | 5.6               |
| <b>B42</b><br>24 images<br>142-235 km <sup>2</sup>  | U-net   | <b>0.88</b>            | 13           | <b>0.6</b>         | <b>5.4</b>        |
|                                                     | Otsu    | 0.84                   | <b>6</b>     | 1.7                | 8.9               |
|                                                     | k-means | 0.76                   | 28           | 1.0                | 18.7              |
| <b>C34</b><br>24 images<br>61-101 km <sup>2</sup>   | U-net   | <b>0.81</b>            | <b>20</b>    | <b>0.4</b>         | <b>3.7</b>        |
|                                                     | Otsu    | 0.20                   | 36           | 10.1               | 4.3               |
|                                                     | k-means | 0.23                   | 32           | 9.1                | 5.2               |

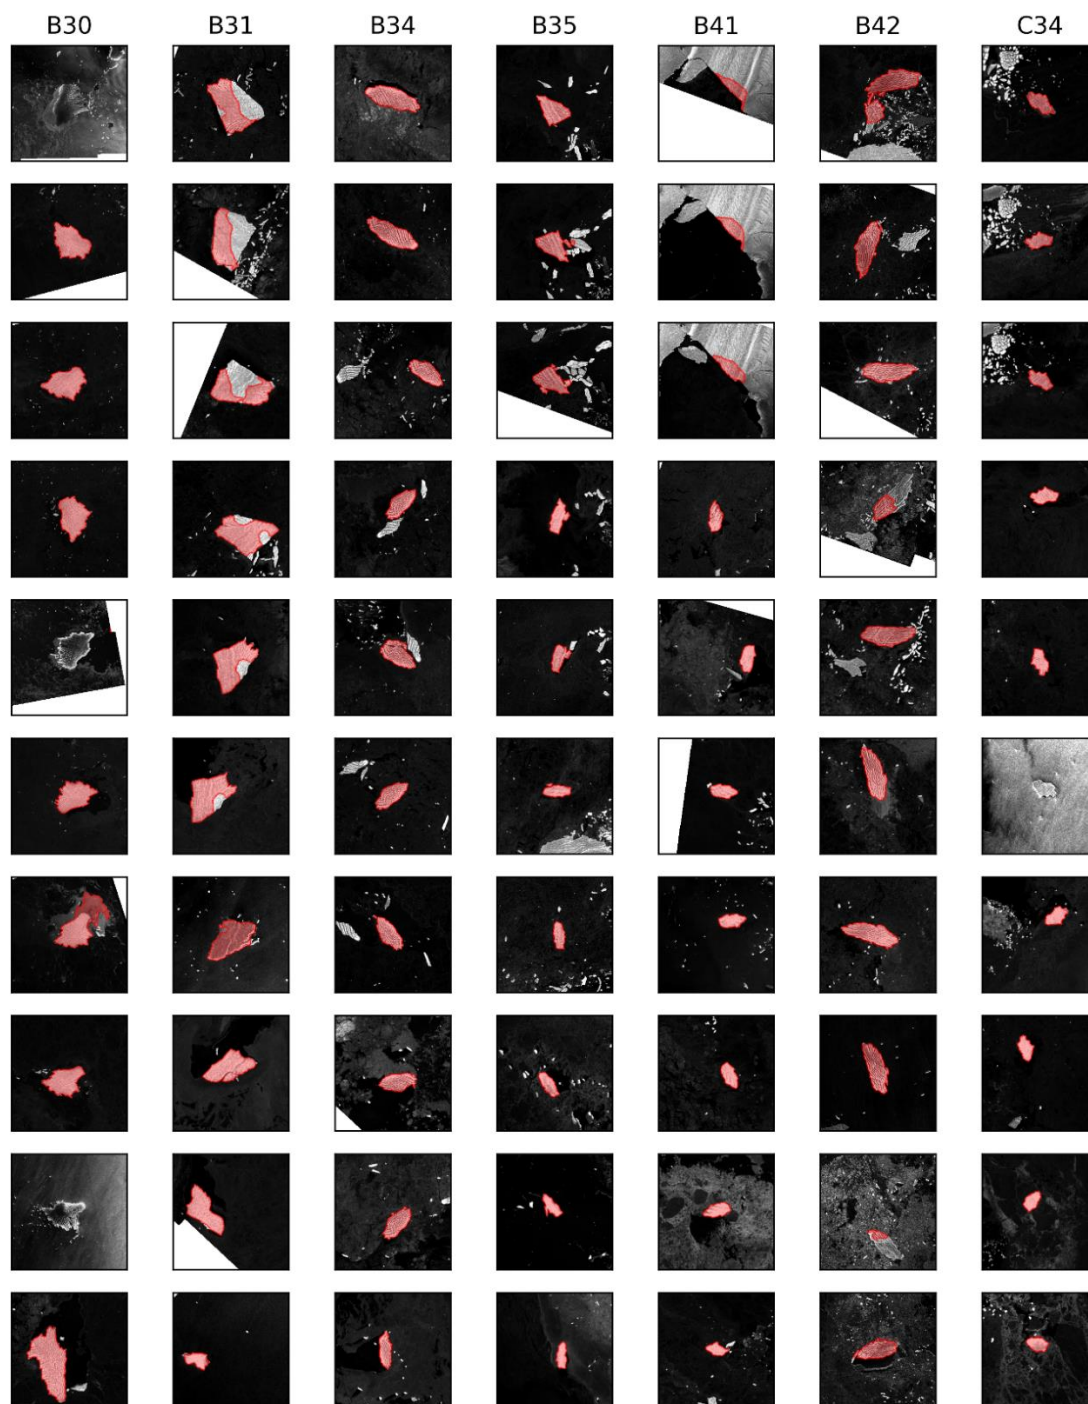

310 **Figure 4:** U-net derived iceberg outlines (red) plotted on top of the input images for 10 images per iceberg (columns). We always include the first and last image from each time series and sample the others equally in between. As the number of images per iceberg ranges from 15-46, this means that images of B34 are 1-2 months apart, while the images for B41 are 5 months apart in this figure. The full time series and results of all methods can be viewed in the supplementary animations (one per iceberg).

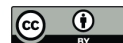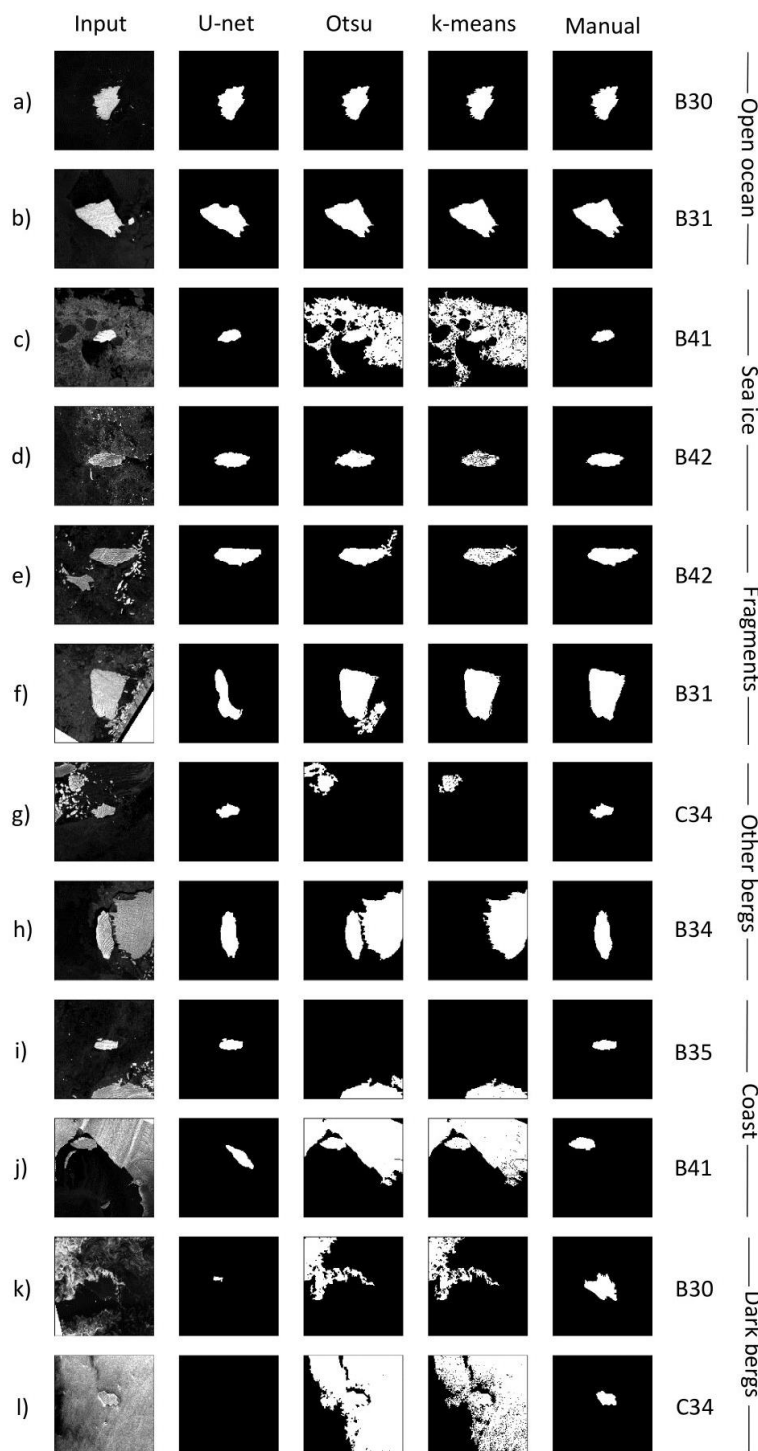

Figure 5: Examples of input images (first column) and segmentation maps generated by U-net (second column), Otsu (third column), k-means (fourth column), and from manual delineations (last column). We picked these images for illustration to cover each category of environmental conditions twice and to include all icebergs (labelled on the right).

315



### 3.3. Impact of different environmental conditions

Grouping the images according to the surrounding environmental conditions (see Section 2.2.) allows us to judge how well each method can deal with the respective challenge (Figure 5, Table 3). Open ocean makes up most of the images (46 %) all methods perform very well with  $F_1$  scores of 0.93-0.95 and MAD in area of 2.4-3.2 %. The Otsu threshold performs best, but the differences between the methods are very small. The two sample images (Figure 5a, b) also illustrate that the only problem in this category is rather that U-net generally tends to miss parts of B31 than open ocean in itself. Sea ice occurs in 14 % of our images. U-net achieves the best  $F_1$  score (0.88 compared to 0.72 and 0.74), but the Otsu threshold gives a slightly better MAD in area (4.3 % rather than 4.8 % and 5.4 %). Visually, the U-net predictions seem to be the most robust, as sea ice is discarded reliably. In contrast, the two other methods sometimes connect patches of sea ice to the iceberg (Figure 5c) but also work fine in other cases (Figure 5d).

**Table 3: Performance of the three methods in different environmental conditions. The first column also indicates how often these conditions occur in our data set. Arrows indicate whether high (up) or low (down) numbers are desirable. The best values per category and metric are highlighted in bold.**

|                             |         | $F_1$ score $\uparrow$ | Misses [%] $\downarrow$ | False Alarms [%] $\downarrow$ | MAD in area [%] $\downarrow$ |
|-----------------------------|---------|------------------------|-------------------------|-------------------------------|------------------------------|
| <b>Open ocean</b><br>(46 %) | U-net   | 0.93                   | 11                      | <b>0.1</b>                    | 2.8                          |
|                             | Otsu    | <b>0.95</b>            | <b>2</b>                | 0.4                           | <b>2.4</b>                   |
|                             | k-means | <b>0.95</b>            | 4                       | 0.3                           | 3.2                          |
| <b>Sea ice</b><br>(14 %)    | U-net   | <b>0.88</b>            | 14                      | <b>0.3</b>                    | 4.8                          |
|                             | Otsu    | 0.72                   | <b>3</b>                | 2.4                           | <b>4.3</b>                   |
|                             | k-means | 0.74                   | 11                      | 1.7                           | 5.4                          |
| <b>Fragments</b><br>(24 %)  | U-net   | 0.85                   | 21                      | <b>0.4</b>                    | 6.9                          |
|                             | Otsu    | <b>0.94</b>            | <b>2</b>                | 0.7                           | 5.9                          |
|                             | k-means | <b>0.94</b>            | 7                       | <b>0.4</b>                    | <b>5.7</b>                   |
| <b>Other bergs</b><br>(3 %) | U-net   | <b>0.96</b>            | <b>6</b>                | <b>0.0</b>                    | <b>5.9</b>                   |
|                             | Otsu    | 0.18                   | 66                      | 7.7                           | 110                          |
|                             | k-means | 0.10                   | 86                      | 5.7                           | 11                           |
| <b>Coast</b><br>(8 %)       | U-net   | <b>0.34</b>            | 68                      | <b>1.8</b>                    | <b>18</b>                    |
|                             | Otsu    | 0.12                   | <b>38</b>               | 29.5                          | 1200                         |
|                             | k-means | 0.11                   | 44                      | 28.6                          | 1200                         |
| <b>Dark bergs</b><br>(5 %)  | U-net   | <b>0.12</b>            | 92                      | <b>1.1</b>                    | <b>96</b>                    |
|                             | Otsu    | <b>0.12</b>            | <b>54</b>               | 34.3                          | 450                          |
|                             | k-means | 0.11                   | 62                      | 30.5                          | 460                          |



Iceberg fragments drifting in the direct proximity of the target iceberg were found in 24 % of our images. Overall, k-means scores best in this category with a MAD of 5.7 % compared to 5.9 % and 6.9 %. In terms of  $F_1$  score, Otsu and k-means both reach 0.94, whereas U-net only reaches 0.85. Visually, there are a few instances where Otsu connects more fragments to the iceberg than k-means and U-net (Figure 5e, f). This might be due to the Gaussian smoothing that we apply before the thresholding. We do not apply this step before k-means and find that k-means tends to rather oversegment images, leaving small holes in the inside (Figure 5d, e). In the case of fragments, however, this turns out to be beneficial, as it allows k-means to reliably separate fragments from icebergs, even when they are very close by. The problem for U-net does not seem to be the actual fragments itself, as it rarely connects any fragments to the iceberg (Figure 5e, f). However, the images containing fragments are mostly from the large B31 and B42 icebergs, where U-net struggles due to their large extent. This can also be seen from the fact that U-net and k-means both generate only 0.4 % false alarms (fragments erroneously connected to the iceberg), but U-net has a much higher miss rate.

In 3 % of all images, another similar sized or bigger berg is (partially) visible. U-net scores best in all categories with a large margin, yielding an  $F_1$  score of 0.96 compared to 0.12 and 0.11 and MAD in  $\mu$  of 5.9 % compared to 11 % and 110 %. Also visually, it becomes clear that U-net reliably picks the target iceberg and discards any other ice, while Otsu and k-means often pick the wrong berg or connect both with each other (Figure 5g, h). Considering iceberg shape and size in a tracking scenario could help mitigate this phenomenon, though (Barbat et al., 2021; Collares et al., 2018; Koo et al., 2021).

Coast is present in 8 % of all images and U-net outperforms the other techniques but also struggles in some cases. The  $F_1$  score is 0.34 for U-net and 0.12 and 0.11 for Otsu and k-means respectively. While U-net achieves a MAD of 18 %, the other methods yield over 100 % each. Figure 5j illustrates what is happening in these cases: If too much coast is present, all algorithms pick the coast rather than the iceberg (and this is much larger than the iceberg, hence 1000 % deviation). However, U-net discards smaller parts of the coast around the image edges (Figure 5i). This is on the one hand because of the sliding convolution window and on the other hand, because U-net learns that the iceberg is usually in the centre (as we crop the images around the estimated position from operational iceberg tracking databases). Hence, U-net is able to correctly pick out the iceberg if not too much coast is present. For the same reason, it is easier for U-net to discard other bergs at the image edges. Interestingly, even when a lot of coast is present, U-net does not pick the full coast but predicts either nothing or a small – almost iceberg shaped – part of the coast (Figure 5j). This could indicate that U-net even learns that only ice that is fully surrounded by water is an iceberg. A possible strategy to avoid misclassifications due to large amounts of coast would be the inclusion of a land mask (Barbat et al., 2019; Collares et al., 2018; Frost et al., 2016; Mazur et al., 2017; Silva and Bigg, 2005). However, ice shelves and glaciers advance and retreat regularly and especially the calving of icebergs themselves significantly alters the land mask. Thus, just after calving, the iceberg would be within the former land mask and could not be picked up. The last category of dark icebergs is the hardest and makes up 5 % of the overall data set. In these cases, all methods fail with  $F_1$  scores of 0.11-0.12 and the lowest MAD in  $\mu$  of 96 %. Again, it is interesting that U-net predicts either very small patches or nothing at all in these cases (Figure 5k, l), while the other two methods segment large areas of lighter looking ocean.



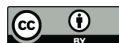

365 Potentially, U-net could learn to segment dark icebergs with a lot more training examples, but we only had ten such images in our overall data set. Finally, we would like to stress that the occurrence of these different environmental conditions will vary and our data set is not necessarily representative of all icebergs. We also find that the influence of iceberg size and environmental conditions cannot always be disentangled, as subsequent images of the same iceberg are often similar and the different environmental conditions are not spread equally across the different test data sets (individual icebergs).

### 370 3.4. Comparison to previous studies

Previous studies state different accuracy measures and due to the slightly different goal to detect all icebergs in a scene rather than finding one giant iceberg and accurately predicting its outline and area, they are not straightforward to compare. Two studies employ the k-means algorithm (Collares et al., 2018) or a variation of it (Koo et al., 2021), so we have indirectly compared U-net to them. None of them report any of our accuracy measures, though. Many of the previous approaches rely on some form of thresholding (Frost et al., 2016; Gill, 2001; Mazur et al., 2017; Power et al., 2001; Wesche and Dierking, 2012; Willis et al., 1996). We somehow covered these methods by comparing U-net to the Otsu threshold, but the exact approaches varied and none of them have applied the Otsu threshold. Two of the threshold-based methods report estimates for their area deviations. Wesche and Dierking (2012) state that iceberg area was overestimated by  $10 \pm 21$  % with their approach. In a following study, they find that for the correctly detected icebergs 13.3 % of the total area was missing (Wesche and Dierking, 2015), meaning a bias in the opposite direction. Mazur et al. (2017) find positive and negative area deviations of  $\pm 25$  % on average. For edge-detection based algorithms, Williams et al. (1999) find an overestimation of iceberg area by 20 % and Silva and Bigg (2005)'s approach yields an underestimation of iceberg area by 10-13 %. These are biases against both approaches are limited to winter images. For U-net, we find a bias of  $-5.0 \pm 29.1$  %, which is lower than previous studies but comes with a relatively high standard deviation due to some complete failures where the iceberg is not found at all. Previous studies only compare iceberg areas where icebergs were detected successfully. Barbat et al. (2019) report the lowest false positive (2.3 %) and false negative (3.3 %) rate and the highest overall accuracy (97.5 %) of all previous studies. While their false negative rate is lower than our false negative rate (21 %), U-net achieves a lower false positive rate of 0.4 % and higher overall accuracy of 99 %. In a second study, Barbat et al. (2021) also analyse the area deviation of the detected icebergs and find average area deviations of  $10 \pm 4$  %, which is also the best score reported so far. They only consider correctly detected icebergs in this metric, though. We find a MAE of  $15 \pm 26$  % for U-net, which is slightly higher but contains images where the iceberg was not found at all. These cases are not included in Barbat et al. (2021)'s estimates. Our MAD, which is less sensitive to such outliers, is 4.1 %, with 25 % and 75 % quantiles of 2.1 % and 12.1 %. These metrics compare favourably to all previous studies. We also demonstrate in our study, that the performance varies depending on the chosen test data set and therefore, all measures and comparisons can only give an indication of the real performance. Judging from the data we have and comparing our results on this to previous studies as good as possible, U-net proves to be a very promising approach. Qualitatively, previous studies have found degraded accuracies in challenging environmental conditions or excluded these from their datasets. Some studies report false detections due to sea ice (Koo et al., 2021; Mazur et al., 2017; Wesche and



Dierking, 2012) or only applied their algorithm to sea-ice free conditions (Willis et al., 1996). Moreover, several previous studies have also encountered problems with clusters of several bergs and berg fragments too close to each other (Barbat et al., 2019a; Frost et al., 2016; Koo et al., 2021; Williams et al., 1999). Also U-net shows slightly degraded performance in these situations (4.8 and 6.9 % MAD in area compared to 2.8 % in open ocean and  $F_1$  scores of 0.88 and 0.85 compared to 0.93 but still achieves satisfying results in most of these cases. The challenge of other big bergs does not occur in previous studies since they were looking for all icebergs anyway. In terms of coast, many previous studies have employed a land mask (e.g. Barbat et al., 2019; Collares et al., 2018; Frost et al., 2016; Mazur et al., 2017; Silva and Bigg, 2005), but might miss newly calved bergs due to that. Finally, the problem of dark icebergs has been described in several papers (Mazur et al., 2017; Wesche and Dierking, 2012; Williams et al., 1999) but was rarely mentioned in the evaluation. This is likely because most previous studies use visual inspection to identify misses and false alarms (e.g. Barbat et al., 2019; Frost et al., 2016; Mazur et al., 2017; Wesche and Dierking, 2012; Williams et al., 1999). However, dark icebergs are hard to spot in SAR images even for humans, so they might be missed by the visual inspection, unless in our case we know that there must be an iceberg of a certain size and shape that we are looking for. Others limit their method to winter images when dark icebergs do not occur (Silva and Bigg, 2005; Williams et al., 1999; Young et al., 1998).

#### 4 Conclusions

We have developed a novel algorithm to segment giant Antarctic icebergs in Sentinel-1 images automatically. It is the first study to apply a deep neural network for iceberg segmentation. Furthermore, it is also the first study specifically targeting giant icebergs. Comparing U-net to two state-of-the-art segmentation techniques (Otsu thresholding and k-means), we find that U-net outperforms them in most metrics. Across all 191 images, U-net achieves an  $F_1$  score of 0.84 and a median absolute area deviation of 4.1 %. Only the miss rate of Otsu and k-means is lower than for U-net, as we find that U-net overlooks parts of the iceberg appearing largest in the images, as in this case training samples show smaller icebergs. We believe that this issue could be resolved with a larger training data set. U-net can reliably handle a variety of challenging environmental conditions including sea ice, nearby iceberg fragments, other bergs and small patches of nearby coast. It fails when too much coast is visible and when icebergs appear dark, though. In these cases, all existing algorithms fail, but such obvious errors could easily be picked out in a tracking scenario. Also compared to previous studies, we regard our results as promising. For an operational application, the short-term further post-processing could be implemented to filter outliers, but on the long run, we would suggest to large the training data set.

#### 425 Code availability

The code is available from the authors upon reasonable request.



### Data availability

Segmentation maps for all 191 images and from all three methods are shown in the supplementary animations (one animation per iceberg). DOI: [10.5281/zenodo.7875599](https://doi.org/10.5281/zenodo.7875599) (Braakmann-Folgmann, 2023). The Sentinel-1 images are freely available from  
430 <https://scihub.copernicus.eu/dhus/>.

### Author contributions

ABF, AS and DH designed the study. ER clicked most of the iceberg outlines, which are used as training data, during her internship, supervised by ABF. ABF also generated some of the outlines. ABF designed and implemented the U-net architecture, implemented the comparison methods, plotted the figures and wrote the manuscript. AS and DH supervised the  
435 work and suggested edits to the manuscript.

### Competing interests

The authors declare that they have no conflict of interest.

### Acknowledgement

This work was supported by Barry Slavin and by NERC through National Capability funding, undertaken by a partnership  
440 between the Centre for Polar Observation Modelling and the British Antarctic Survey. The Antarctic Mapping Toolbox (Greene et al., 2017) was used. We would also like to thank the European Space Agency's  $\phi$ -lab team for hosting Anne Braakmann-Folgmann during a three-month research visit and for several useful discussions and inspiration during this time and beyond. Thank you especially to Andreas Stokholm and Michael Marszalek.

### References

- 445 Andersson, T. R., Hosking, J. S., Pérez-Ortiz, M., Paige, B., Elliott, A., Russell, C., Law, S., Jones, D. C., Wilkinson, J., Phillips, T., Byrne, J., Tietsche, S., Sarojini, B. B., Blanchard-Wrigglesworth, E., Aksenov, Y., Downie, R. and Shuckburgh, E.: Seasonal Arctic sea ice forecasting with probabilistic deep learning, *Nat. Commun.*, 12(1), 1–12, <https://doi.org/10.1038/s41467-021-25257-4>, 2021.
- 450 Barbat, M. M., Wesche, C., Werhli, A. V. and Mata, M. M.: An adaptive machine learning approach to improve automatic iceberg detection from SAR images, *ISPRS J. Photogramm. Remote Sens.*, 156(August), 247–259, <https://doi.org/10.1016/j.isprsjprs.2019.08.015>, 2019a.



- Barbat, M. M., Rackow, T., Hellmer, H. H., Wesche, C. and Mata, M. M.: Three Years of Near-Coastal Antarctic Iceberg Distribution From a Machine Learning Approach Applied to SAR Imagery, *J. Geophys. Res. Ocean.*, 124(9), 6658–6672, <https://doi.org/10.1029/2019JC015205>, 2019b.
- 455 Barbat, M. M., Rackow, T., Wesche, C., Hellmer, H. H. and Mata, M. M.: Automated iceberg tracking with a machine learning approach applied to SAR imagery : A Weddell sea case study, *ISPRS J. Photogramm. Remote Sens.*, 172(December 2020), 189–206, <https://doi.org/10.1016/j.isprsjprs.2020.12.006>, 2021.
- Baumhoer, C. A., Dietz, A. J., Kneisel, C. and Kuenzer, C.: Automated extraction of antarctic glacier and ice shelf fronts from Sentinel-1 imagery using deep learning, *Remote Sens.*, 11(21), 1–22,  
460 <https://doi.org/10.3390/rs11212529>, 2019.
- Bigg, G. R., Wadley, M. R., Stevens, D. P. and Johnson, J. A.: Modelling the dynamics and thermodynamics of icebergs, *cold Reg. Sci. Technol.*, 26(2), 113–135, [https://doi.org/10.1016/S0165-232X\(97\)00012-8](https://doi.org/10.1016/S0165-232X(97)00012-8), 1997.
- Bouhier, N., Tournadre, J., Rémy, F. and Gourves-Cousin, R.: Melting and fragmentation laws from the evolution of two large Southern Ocean icebergs estimated from satellite data, *Cryosphere*, 12(7), 2267–2285,  
465 <https://doi.org/10.5194/tc-12-2267-2018>, 2018.
- Braakmann-Folgmann, A.: Segmentation maps of giant Antarctic icebergs, ,  
<https://doi.org/10.5281/zenodo.7875599>, 2023.
- Braakmann-Folgmann, A., Shepherd, A. and Ridout, A.: Tracking changes in the area, thickness, and volume of the Thwaites tabular iceberg “B30” using satellite altimetry and imagery, *Cryosphere*, 15(8), 3861–3876,  
470 <https://doi.org/10.5194/tc-15-3861-2021>, 2021.
- Braakmann-Folgmann, A., Shepherd, A., Gerrish, L., Izzard, J. and Ridout, A.: Observing the disintegration of the A68A iceberg from space, *Remote Sens. Environ.*, 270, 112855, <https://doi.org/10.1016/j.rse.2021.112855>, 2022.
- Bradski, G.: *The OpenCV Library*, Dr. Dobb’s J. Softw. Tools, 2000.
- 475 Budge, J. S. and Long, D. G.: A Comprehensive Database for Antarctic Iceberg Tracking Using Scatterometer Data, *IEEE J. Sel. Top. Appl. Earth Obs. Remote Sens.*, 11(2), 434–442, <https://doi.org/10.1109/JSTARS.2017.2784186>, 2018.
- Chollet, F.: Xception: Deep learning with depthwise separable convolutions, *Proc. - 30th IEEE Conf. Comput. Vis. Pattern Recognition, CVPR 2017*, 1800–1807, <https://doi.org/10.1109/CVPR.2017.195>, 2017.
- 480 Chollet, F. and Others, &: *Keras*, <https://github.com/fchollet/keras>, 2015.



- Collares, L. L., Mata, M. M., Kerr, R., Arigony-Neto, J. and Barbat, M. M.: Iceberg drift and ocean circulation in the northwestern Weddell Sea, Antarctica, *Deep. Res. Part II Top. Stud. Oceanogr.*, 149(March), 10–24, <https://doi.org/10.1016/j.dsr2.2018.02.014>, 2018.
- 485 Dirscherl, M., Dietz, A. J., Kneisel, C. and Kuenzer, C.: A novel method for automated supraglacial lake mapping in antarctica using sentinel-1 sar imagery and deep learning, *Remote Sens.*, 13(2), 1–27, <https://doi.org/10.3390/rs13020197>, 2021.
- Drinkwater, M. R.: Satellite Microwave Radar Observations of Antarctic Sea Ice, *Anal. SAR Data Polar Ocean.*, 145–187, [https://doi.org/10.1007/978-3-642-60282-5\\_8](https://doi.org/10.1007/978-3-642-60282-5_8), 1998.
- Duprat, L. P. A. M., Bigg, G. R. and Wilton, D. J.: Enhanced Southern Ocean marine productivity due to  
490 fertilization by giant icebergs, *Nat. Geosci.*, 9(3), 219–221, <https://doi.org/10.1038/ngeo2633>, 2016.
- England, M. R., Wagner, T. J. W. and Eisenman, I.: Modeling the breakup of tabular icebergs, *Sci. Adv.*, 6(51), 1–9, <https://doi.org/10.1126/sciadv.abd1273>, 2020.
- Frost, A., Ressel, R. and Lehner, S.: Automated iceberg detection using high resolution X - band SAR images, *Can. J. Remote Sens.*, 42(4), <https://doi.org/https://doi.org/10.1080/07038992.2016.1177451>, 2016.
- 495 Gawlikowski, J., Tassi, C. R. N., Ali, M., Lee, J., Humt, M., Feng, J., Kruspe, A., Triebel, R., Jung, P., Roscher, R., Shahzad, M., Yang, W., Bamler, R. and Zhu, X. X.: A Survey of Uncertainty in Deep Neural Networks, 1–41 <http://arxiv.org/abs/2107.03342>, 2021.
- Gill, R. S.: Operational detection of sea ice edges and icebergs using SAR, *Can. J. Remote Sens.*, 27(5), 411–432, <https://doi.org/10.1080/07038992.2001.10854884>, 2001.
- 500 Greene, C. A., Gwyther, D. E. and Blankenship, D. D.: Antarctic Mapping Tools for MATLAB, *Comput. Geosci.*, 104, 151–157, <https://doi.org/10.1016/j.cageo.2016.08.003>, 2017.
- He, K., Zhang, X., Ren, S. and Sun, J.: Deep residual learning for image recognition, *Proc. IEEE Comput. Soc. Conf. Comput. Vis. Pattern Recognit.*, 2016-Decem, 770–778, <https://doi.org/10.1109/CVPR.2016.90>, 2016.
- Helly, J. J., Kaufmann, R. S., Stephenson, G. R. and Vernet, M.: Cooling, dilution and mixing of ocean water by  
505 free-drifting icebergs in the Weddell Sea, *Deep. Res. Part II Top. Stud. Oceanogr.*, 58(11–12), 1346–1363, <https://doi.org/10.1016/j.dsr2.2010.11.010>, 2011.
- Jansen, D., Schodlok, M. and Rack, W.: Basal melting of A-38B: A physical model constrained by satellite observations, *Remote Sens. Environ.*, 111(2), 195–203, <https://doi.org/10.1016/j.rse.2007.03.022>, 2007.
- Jenkins, A.: The impact of melting ice on ocean waters, *J. Phys. Oceanogr.*, 29(9), 2370–2381, [https://doi.org/10.1175/1520-0485\(1999\)029<2370:TIOMIO>2.0.CO;2](https://doi.org/10.1175/1520-0485(1999)029<2370:TIOMIO>2.0.CO;2), 1999.
- 510

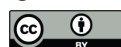

- Kingma, D. P. and Ba, J. L.: Adam: A method for stochastic optimization, 3rd Int. Conf. Learn. Represent. ICLR 2015 - Conf. Track Proc., 1–15, 2015.
- Koo, Y., Xie, H., Ackley, S. F., Mestas-Nunez, A. M., Macdonald, G. J. and Hyun, C.-U.: Semi-automated tracking of iceberg B43 using Sentinel-1 SAR images via Google Earth Engine, *Cryosph.*, 15(May), 4727–4744, <https://doi.org/https://doi.org/10.5194/tc-15-4727-2021>, 2021.
- 515
- LeCun, Y., Bengio, Y. and Hinton, G.: Deep learning, *Nature*, 521(7553), 436–444, <https://doi.org/10.1038/nature14539>, 2015.
- Macqueen, J.: SOME METHODS FOR CLASSIFICATION AND ANALYSIS OF MULTIVARIATE OBSERVATIONS, in *Proceedings of the fifth Berkeley symposium on mathematical statistics and probability*, vol. 233, pp. 281–297, California: University of California Press., , 1967.
- 520
- Mazur, A. K., Wählin, A. K. and Krężel, A.: An object-based SAR image iceberg detection algorithm applied to the Amundsen Sea, *Remote Sens. Environ.*, 189, 67–83, <https://doi.org/10.1016/j.rse.2016.11.013>, 2017.
- Merino, N., Le Sommer, J., Durand, G., Jourdain, N. C., Madec, G., Mathiot, P. and Tournadre, J.: Antarctic icebergs melt over the Southern Ocean : Climatology and impact on sea ice, *Ocean Model.*, 104, 99–110, <https://doi.org/10.1016/j.ocemod.2016.05.001>, 2016.
- 525
- Mohajerani, Y., Wood, M., Velicogna, I. and Rignot, E.: Detection of glacier calving margins with convolutional neural networks: A case study, *Remote Sens.*, 11(1), 1–13, <https://doi.org/10.3390/rs11010074>, 2019.
- Mohajerani, Y., Jeong, S., Scheuchl, B., Velicogna, I., Rignot, E. and Milillo, P.: Automatic delineation of glacier grounding lines in differential interferometric synthetic-aperture radar data using deep learning, *Sci. Rep.*, 11(1), 1–10, <https://doi.org/10.1038/s41598-021-84309-3>, 2021.
- 530
- Otsu, N.: A Threshold Selection Method from Gray-Level Histograms, *IEEE Trans. Syst. Man. Cybern.*, C(1), 62–66, 1979.
- Poliyapram, V., Imamoglu, N. and Nakamura, R.: DEEP LEARNING MODEL FOR WATER / ICE / LAND CLASSIFICATION USING LARGE-SCALE MEDIUM RESOLUTION SATELLITE IMAGES, *IGARSS 2019 - 2019 IEEE Int. Geosci. Remote Sens. Symp.*, (d), 3884–3887, 2019.
- 535
- Power, D., Youden, J., Lane, K., Randell, C. and Flett, D.: Iceberg detection capabilities of radarsat synthetic aperture radar, *Can. J. Remote Sens.*, 27(5), 476–486, <https://doi.org/10.1080/07038992.2001.10854888>, 2001.
- Ronneberger, O., Fischer, P. and Brox, T.: U-net: Convolutional networks for biomedical image segmentation, *Lect. Notes Comput. Sci. (including Subser. Lect. Notes Artif. Intell. Lect. Notes Bioinformatics)*, 9351, 234–241, [https://doi.org/10.1007/978-3-319-24574-4\\_28](https://doi.org/10.1007/978-3-319-24574-4_28), 2015.
- 540

Sandven, S., Babiker, M. and Kloster, K.: Iceberg observations in the barents sea by radar and optical satellite images, in Proceedings of the Envisat Symposium, , 2007.

545 Schmidhuber, J.: Deep Learning in neural networks: An overview, *Neural Networks*, 61, 85–117, <https://doi.org/10.1016/j.neunet.2014.09.003>, 2015.

Sephton, A. J., Brown, L. M., Macklin, J. T., Partington, K. C., Veck, N. J. and Rees, W. G.: Segmentation of synthetic-aperture radar imagery of sea ice, *Int. J. Remote Sens.*, 15(4), 803–825, <https://doi.org/10.1080/01431169408954118>, 1994.

550 Silva, T. A. M. and Bigg, G. R.: Computer-based identification and tracking of Antarctic icebergs in SAR Computer-based identification and tracking of Antarctic icebergs in SAR images, , (May 2018), <https://doi.org/10.1016/j.rse.2004.10.002>, 2005.

Silva, T. A. M., Bigg, G. R. and Nicholls, K. W.: Contribution of giant icebergs to the Southern Ocean freshwater flux, *J. Geophys. Res.*, 111(July 2005), 1–8, <https://doi.org/10.1029/2004JC002843>, 2006.

555 Singh, A., Kalke, H., Loewen, M. and Ray, N.: River Ice Segmentation with Deep Learning, *IEEE Trans. Geosci. Remote Sens.*, 58(11), <https://doi.org/10.1109/TGRS.2020.2981082>, 2020.

Smith, K. L., Robison, B. H., Helly, J. J., Kaufmann, R. S., Ruhl, H. A., Shaw, T. J., Twining, B. S. and Vernet, M.: Free-drifting icebergs: Hot spots of chemical and biological enrichment in the Weddell Sea, *Science* (80-), 317(5837), 478–482, <https://doi.org/10.1126/science.1142834>, 2007.

560 Srivastava, N., Hinton, G., Krizhevsky, A., Sutskever, I. and Salakhutdinov, R.: Dropout: A simple way to prevent neural networks from overfitting, *J. Mach. Learn. Res.*, 15, 1929–1958, 2014.

Stokholm, A., Wulf, T., Kucik, A., Saldo, R., Buus-Hinkler, J. and Hvidegaard, S. M.: AI4SeaIce: Toward Solving Ambiguous SAR Textures in Convolutional Neural Networks for Automatic Sea Ice Concentration Charting, *IEEE Trans. Geosci. Remote Sens.*, 60, <https://doi.org/10.1109/TGRS.2022.3149323>, 2022.

565 Surawy-Stepney, T., Hogg, A. E., Cornford, S. L. and Davison, B. J.: Episodic dynamic change linked to damage on the thwaites glacier ice tongue, *Nat. Geosci.*, 16(1), 37–43, <https://doi.org/10.1038/s41561-022-01097-9>, 2023.

Torres, R., Snoeij, P., Geudtner, D., Bibby, D., Davidson, M., Attema, E., Potin, P., Rommen, B., Floury, N., Brown, M., Navas, I., Deghaye, P., Duesmann, B., Rosich, B., Miranda, N., Bruno, C., Abbate, M. L., Croci, R., Pietropaolo, A., Huchler, M. and Rostan, F.: GMES Sentinel-1 mission, *Remote Sens. Environ.*, 120, 9–  
570 24, <https://doi.org/10.1016/j.rse.2011.05.028>, 2012.

Tournadre, J., Bouhier, N., Girard-Ardhuin, F. and Rémy, F.: Antarctic icebergs distributions 1992–2014, *J. Geophys. Res. Ocean.*, 121(1), 327–349, <https://doi.org/10.1002/2015JC011178>, 2016.



- Ulaby, F. T. and Long, D. G.: Microwave radar and radiometric remote sensing, The University of Michigan Press., 2014.
- 575 Vernet, M., Smith, K. L., Cefarelli, A. O., Helly, J. J., Kaufmann, R. S., Lin, H., Long, D. G., Murray, A. E., Robison, B. H., Ruhl, H. A., Shaw, T. J., Sherman, A. D., Sprintall, J., Stephenson, G. R., Stuart, K. M. and Twining, B. S.: Islands of ice: Influence of free-drifting Antarctic icebergs on pelagic marine ecosystems, *Oceanography*, 25(3), 38–39, <https://doi.org/10.5670/oceanog.2012.72>, 2012.
- Wesche, C. and Dierking, W.: Iceberg signatures and detection in SAR images in two test regions of the Weddell  
580 Sea, Antarctica, *J. Glaciol.*, 58(208), 325–339, <https://doi.org/10.3189/2012J0G11J020>, 2012.
- Wesche, C. and Dierking, W.: Near-coastal circum-Antarctic iceberg size distributions determined from Synthetic Aperture Radar images, *Remote Sens. Environ.*, 156, 561–569, <https://doi.org/10.1016/j.rse.2014.10.025>, 2015.
- Williams, R. N., Rees, W. G. and Young, N. W.: A technique for the identification and analysis of icebergs in  
585 synthetic aperture radar images of Antarctica, *Int. J. Remote Sens.*, 20(15–16), 3183–3199, <https://doi.org/10.1080/014311699211697>, 1999.
- Willis, C. J., Macklin, J. T., Partington, K. C., Teleki, K. A., Rees, W. G. and Williams, G.: Iceberg detection using ers-1 synthetic aperture radar, *Int. J. Remote Sens.*, 17(9), 1777–1795, <https://doi.org/10.1080/01431169608948739>, 1996.
- 590 Young, N. W. and Hyland, G.: Applications of time series of microwave backscatter over the Antarctic region, in *Proceedings of the third ERS Scientific Symposium, 17-21 March 1997, Florence, Italy*, pp. 1007–1014, Frascati, Italy: European Space Agency, SP-414, , 1997.
- Young, N. W., Turner, D., Hyland, G. and Williams, R. N.: Near-coastal iceberg distributions in East Antarctica, 50-145°E, *Ann. Glaciol.*, 27, 68–74, <https://doi.org/10.3189/1998aog27-1-68-74>, 1998.
- 595 Zhang, E., Liu, L. and Huang, L.: Automatically delineating the calving front of Jakobshavn Isbræ from multitemporal TerraSAR-X images: A deep learning approach, *Cryosphere*, 13(6), 1729–1741, <https://doi.org/10.5194/tc-13-1729-2019>, 2019.
